# Supplementary material
Source: publisher figshare collection journal article supplement (https://gsapubs.figshare.com/ndownloader/files/23313767)
Supplement: Supplementary file 1 [file 23313767]

## Sheet: Sheet1
Pleistocene Nannofossil Event Sumary (Leg 161)
		Event Type		de Kaenel et al. (1999) *				NEW (2018)
BP Chart Horizon	Taxon	GoM	Leg 161	Datum #	Best Age (Ma)	Best Site/Hole	BEST Age (Ma)	BEST Site/Hole	i-cycle	O-stage /Event	Comments
PS107	Gephyrocapsa omega (<4µm)	HO	HO	-	-	-	0.029	975B			HO very rare G. omega (<4µm)
PS105	Gephyrocapsa spp. (<3µm)	Inc	HAO	-	-	-	0.07	977A	i-7		HAO G. muellerae (3-4µm); HCO G. aperta of others; old "G. caribbeanica A1"
	Emiliania huxleyi > Gephyrocapsa spp.	-	Switch	1	0.07	977	0.07	977A	i-7	4 to 5	de Kaenel, Siesser & Murat (1999): Table 12, p. 180; upsection sense; equals LIO Emiliania huxleyi
PS100	Gephyrocapsa caribbeanica (>3µm)	Inc	Inc	-	-	-	0.088	977A			increase G. caribbeanica (>3µm); old "G. caribbeanica A2"
PS95	Gephyrocapsa omega (<4µm)	Inc	Inc	-	-	-	0.166	975B			increase/rare G. omega; old "GO assemblage"; also HAO G. oceanica (<2.5µm)
PS93 (in)	Emiliania huxleyi	LRO	LRO	2	0.218	976	0.218	976A	(i-20)	7.3	de Kaenel, Siesser & Murat (1999): Table 12, p. 180
PS92	Gephyrocapsa spp. (<3µm)	Inc	HAO/Inc	-	-	-	0.238	975B			strong Inc Gephyrocapsa spp. (<1.5µm): old "GS assemblage"; age on acme G. oceanica (>4µm) & inc G. omega
LPS92	Gephyrocapsa caribbeanica	Inc	HAO	-	-	-	0.275	977A	i-24/25		lower I-cycle 24/upper I-cycle 25; old "lower GS assemblage"
LPS92 (in)	Emiliania huxleyi	LO	LO	3	0.27	976	0.275	977A			new age: de Kaenel, Siesser & Murat (1999) had as 0.270 Ma on Table 12, p. 180
PS90	Pseudoemiliania lacunosa "delicate"	HO	HO	4	0.406	975	0.406	975B	i-38		elliptical forms: faint, thin rims w/slits; old "P. lacunosa 1"; de Kaenel, Siesser & Murat (1999): Table 12, p. 179
LPS90	Pseudoemiliania lacunosa	-	HO	-	-	-	0.424	975B			elliptical forms: P. ovata of some; old "lower P. lacunosa 1" only defined as a stronger abundance peak
PS85	Pseudoemiliania lacunosa lacunosa (subell)	HO	HO	-	-	-	0.439	975B			subelliptical to subcircular forms; old "P. lacunosa 1.5"
	Pseudoemiliania lacunosa lacunosa (>7µm)	-	HO	5	0.439	976	0.439	975B			de Kaenel, Siesser & Murat (1999): Table 12, p. 179
	Pseudoemiliania lacunosa lacunosa (circular)	-	HO	-	-	-	0.458	977A			HO circular forms in Leg161: occurs with first Inc/HAO P. ovata
LPS85	Pseudoemiliania lacunosa	Inc	HAO	-	-	-	0.527	975D			old "lower P. lacunosa 1.5": Inc circular & elliptical forms; also GoM acme Gephyrocapsa spp. (<3µm) & Inc G. omega (<4µm)
PS83	Gephyrocapsa omega (>4µm)	HO	HO	-	-	-	0.584	975B			also Leg 161: HFO G. omega (<4µm)
PS82	Pseudoemiliania lacunosa	Inc	HAO	6	0.739	975	0.742	975B	i-68		new age: de Kaenel, Siesser & Murat (1999) had as 0.739 Ma on Table 12, p. 179; old "lower P. lacunosa 1.5"
PS80	Crenalithus japonicus	HO	HO	7	0.781	975	0.781	975B	i-74	19.3	HO C. asanoi of de Kaenel et al. (1999) on Table 12, p. 179: includes elliptical C. asanoi & C. japonicus; old "P. lacunosa 2"
PS79	Crenalithus asanoi	HO	HO	-	-	-	0.825	975B	i-78		HO circular C. asanoi; old "P. lacunosa 2 (large)"; also GoM observe decrease G.omega
PS70A	Crenalithus doronicoides	HRO	Inc/HCO	-	-	-	0.905	975B			Leg 161: used Inc/HCO of C. doronicoides & C. japonicus; old "P. lacunosa 3"
PS70B	Gephyrocapsa omega (>4µm)	LO	LO	8	0.962	976	0.962	976		top 26	de Kaenel, Siesser & Murat (1999): Table 12, p. 178; also in GOM: Inc G. oceanica
LPS70	Crenalithus doronicoides	Inc	Inc	-	-	-	0.99	975B	i-93		strong Inc C. doronicoides with top acme Gepyrocapsa spp. (<3)
LPS70 (in)	Crenalithus asanoi	LO	LO	9	1.122	977	1.122	977	i-106		de Kaenel, Siesser & Murat (1999): Table 12, p. 178; also in GOM: LCO C. doronicoides
PS68	Gephyrocapsa spp. (>6.5µm)	HO	HO	10	1.235	977	1.235	977			de Kaenel, Siesser & Murat (1999): Table 12, p. 178; old "G. caribbeanica B"
PS65	Helicosphaera sellii	HO	HO	11b	1.246	979	1.246	979		38	de Kaenel, Siesser & Murat (1999): Table 12, p. 178; old "H. cf. sellii" - but form with smaller opening actually as holotype
PS60	Helicosphaera sellii (large openings)	HO	HRO	11	1.276	977	1.276	977	i-122		de Kaenel, Siesser & Murat (1999): Table 12, p. 178; old "H. sellii" - form with larger openings calibrated to HRO in Leg 161
LPS60	Helicosphaera sellii	Inc	HCO	-	-	-	1.357	975B	i-130		HCO H. sellii in Leg 161 calibrated to first downhole increase in GoM
	Pseudoemiliania lacunosa	-	LAO	12	1.361	977	1.361	977	i-130 max	43	de Kaenel, Siesser & Murat (1999): Table 12, p. 178
	Gephyrocapsa oceanica (>6.5µm)	-	LO	13	1.494	979	1.494	979			de Kaenel, Siesser & Murat (1999): Table 12, p. 177
	Gephyrocapsa caribbeanica (>6.5µm)	-	LO	14	1.525	975	1.525	975		51	de Kaenel, Siesser & Murat (1999): Table 12, p. 177
	Gephyrocapsa oceanica (>5.5µm)	LO	LO	15	1.566	974	1.566	974	i-152		de Kaenel, Siesser & Murat (1999): Table 12, p. 177; LO "large" Gephyrocapsa spp. In GoM
	KEY
	Highest Occurrence	HO
	Highest Regular Occurrence	HRO
	Highest Common Occurrence	HCO
	Highest Acme Occurrence	HAO
	Lowest Acme Occurrence	LAO
	Lowest Regular Occurrence	LRO
	Lowest Occurrence	LO
	Downhole Increase	Inc
	NOTE (*): Table 12 from de Kaenel, Siesser, and Murat (1999)
